# Supplementary material for: DeepNull models non-linear covariate effects to improve phenotypic prediction and association power
Source: PubMed Central journal article supplement (PMC8752755; doi:10.1038/s41467-021-27930-0), 2022-01-11
Supplement: 41467_2021_27930_MOESM3_ESM.pdf [file 41467_2021_27930_MOESM3_ESM.pdf]

## Description of Additional Supplementary Files

### Title: Supplementary Data 1

**Description:** Comparison of Baseline and DeepNull models with only linear effects of covariates to phenotype. Pheno: Phenotyp name, DeepNull Power: DeepNull statistical power, DeepNull Expected [X<sup>2</sup>] Causal Chrom: DeepNull expected Chi-square statistics computed from chromosome 22 where the causal variants were implanted, DeepNull Type I Error: Type I error computed for DeepNull, DeepNull Expected [X<sup>2</sup>] Non-Causal Chrom: DeepNull expected Chi-square statistics computed from chromosomes 1 and 2, Baseline Power: Baseline statistical power, Baseline Expected [X<sup>2</sup>] Causal Chrom: Baseline expected Chi-square statistics computed from chromosome 22 where the causal variants were implanted, Baseline Type I Error: Type I error computed for Baseline, Baseline Expected [X<sup>2</sup>] Non-Causal Chrom: Baseline expected Chi-square statistics computed from chromosomes 1 and 2.

### Title: Supplementary Data 2

**Description:** Comparison of Baseline and DeepNull models with covariate interactions. Files have the same column names as Supplementary Data 1.

### Title: Supplementary Data 3

**Description:** Adjusting for covariates provided to DeepNull during association testing is necessary to avoid bias. x: Random variable representing genotype, yhat: Predicted value of the phenotype based on the regression model, z1: Random variable representing the confounder, z2: Random variable representing the square of the confounder, bias\_x: Difference between the estimated and true coefficients for x. This represents bias in estimating the genotypic effect, bias\_yhat: Difference between yhat and the true phenotype, bias\_z1: Difference between the estimated and true coefficients for z1, bias\_z2: Difference between the estimated and true coefficients for z2, model: Association model, described by the variables being adjusted for, beta\_x: Estimated coefficient for x, beta\_z1: Estimated coefficient for z1, beta\_z2: Estimated coefficient for z2, config: Arbitrary index for the simulation configuration, reps: Number of simulation replicates, rho: Correlation between x and z1. In the absence of correlation, i.e.  $\rho = 0$ , z1 is not a confounder, sample\_size: Number of independent subjects simulated on each simulation replicate.
